Retraction

## Retraction: DNA-PK<sub>cs</sub> binding to p53 on the *p21<sup>WAF1/CIP1</sup>* promoter blocks transcription resulting in cell death

Richard Hill<sup>1</sup>, Patricia A. Madureira<sup>2</sup>, David. M. Waisman<sup>2</sup> and Patrick W.K. Lee<sup>1,3</sup>

<sup>1</sup> Department of Microbiology & Immunology, Dalhousie University, Halifax, Nova Scotia, Canada

<sup>2</sup> Department of Biochemistry and Molecular Biology, Dalhousie University, Halifax, Nova Scotia, Canada

<sup>3</sup> Department of Pathology, Dalhousie University, Halifax, Nova Scotia, Canada

**Published:** September 17, 2019

**Copyright:** Hill et al. This is an open-access article distributed under the terms of the Creative Commons Attribution License 3.0 (CC BY 3.0), which permits unrestricted use, distribution, and reproduction in any medium, provided the original author and source are credited.

**This article has been retracted:** Due to numerous examples of splicing and transposition of data into figures, as well as other errors, the authors believe that retraction of this paper is the only responsible and logical course of action. As a result, all authors have agreed to the retraction of this paper from Oncotarget.

Original article: Oncotarget. 2011; 2:1094–1108. <https://doi.org/10.18632/oncotarget.378>
